# Supplementary material
Source: PubMed Central journal article supplement (PMC4187858)

1 **Supplemental Data**

2

3 **Figure 1. Verification of *P. gingivalis* bacteria colonization.** At the termination of the  
4 experiment on Day 28 (two weeks after ligature removal), oral swabs from mice were collected  
5 and *P. gingivalis* bacteria colonization in the oral cavity was confirmed by real time PCR using  
6 the *P. gingivalis* 16S rRNA gene-specific primers. The percentage of *P. gingivalis* to total  
7 bacteria count were calculated (Mean  $\pm$  SE, N=5, \*\*p< 0.01).

8

9 **Figure 2. Animal weight monitoring** The weight of mice (WT, Tlr2<sup>-/-</sup> and Tlr4<sup>-/-</sup>) was  
10 monitored throughout the experimental period (28 days) after treatment of ligation or ligation  
11 plus *P. gingivalis* infection (Mean  $\pm$  SE, N=5).

12

13

14

15

16

17

Suppl Data, Fig. 1

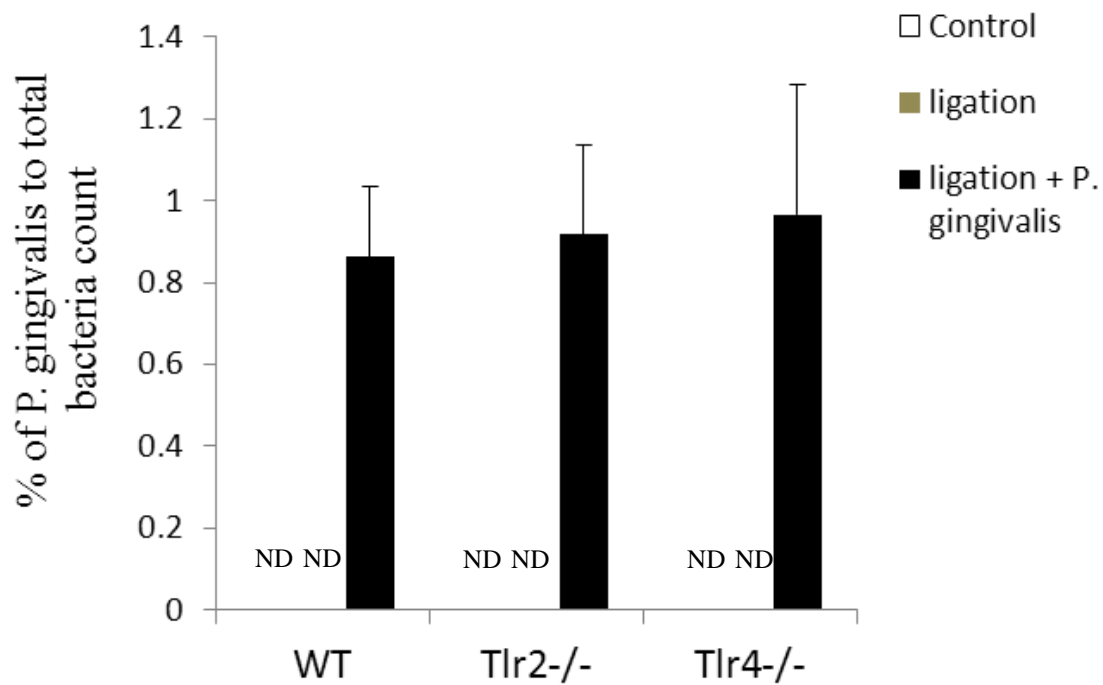

Suppl Data, Fig. 2

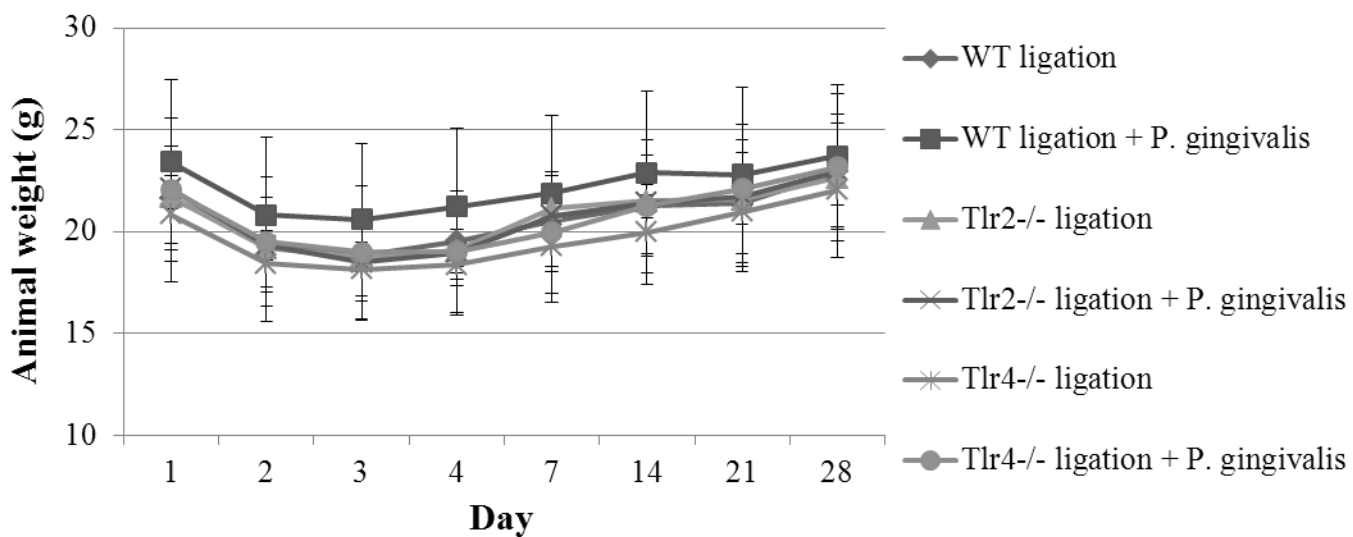

Supplement: IAI.02084-14_zii999090875so1.pdf [file IAI.02084-14_zii999090875so1.pdf]
